# Supplementary material
Source: PubMed Central journal article supplement (PMC3309353)

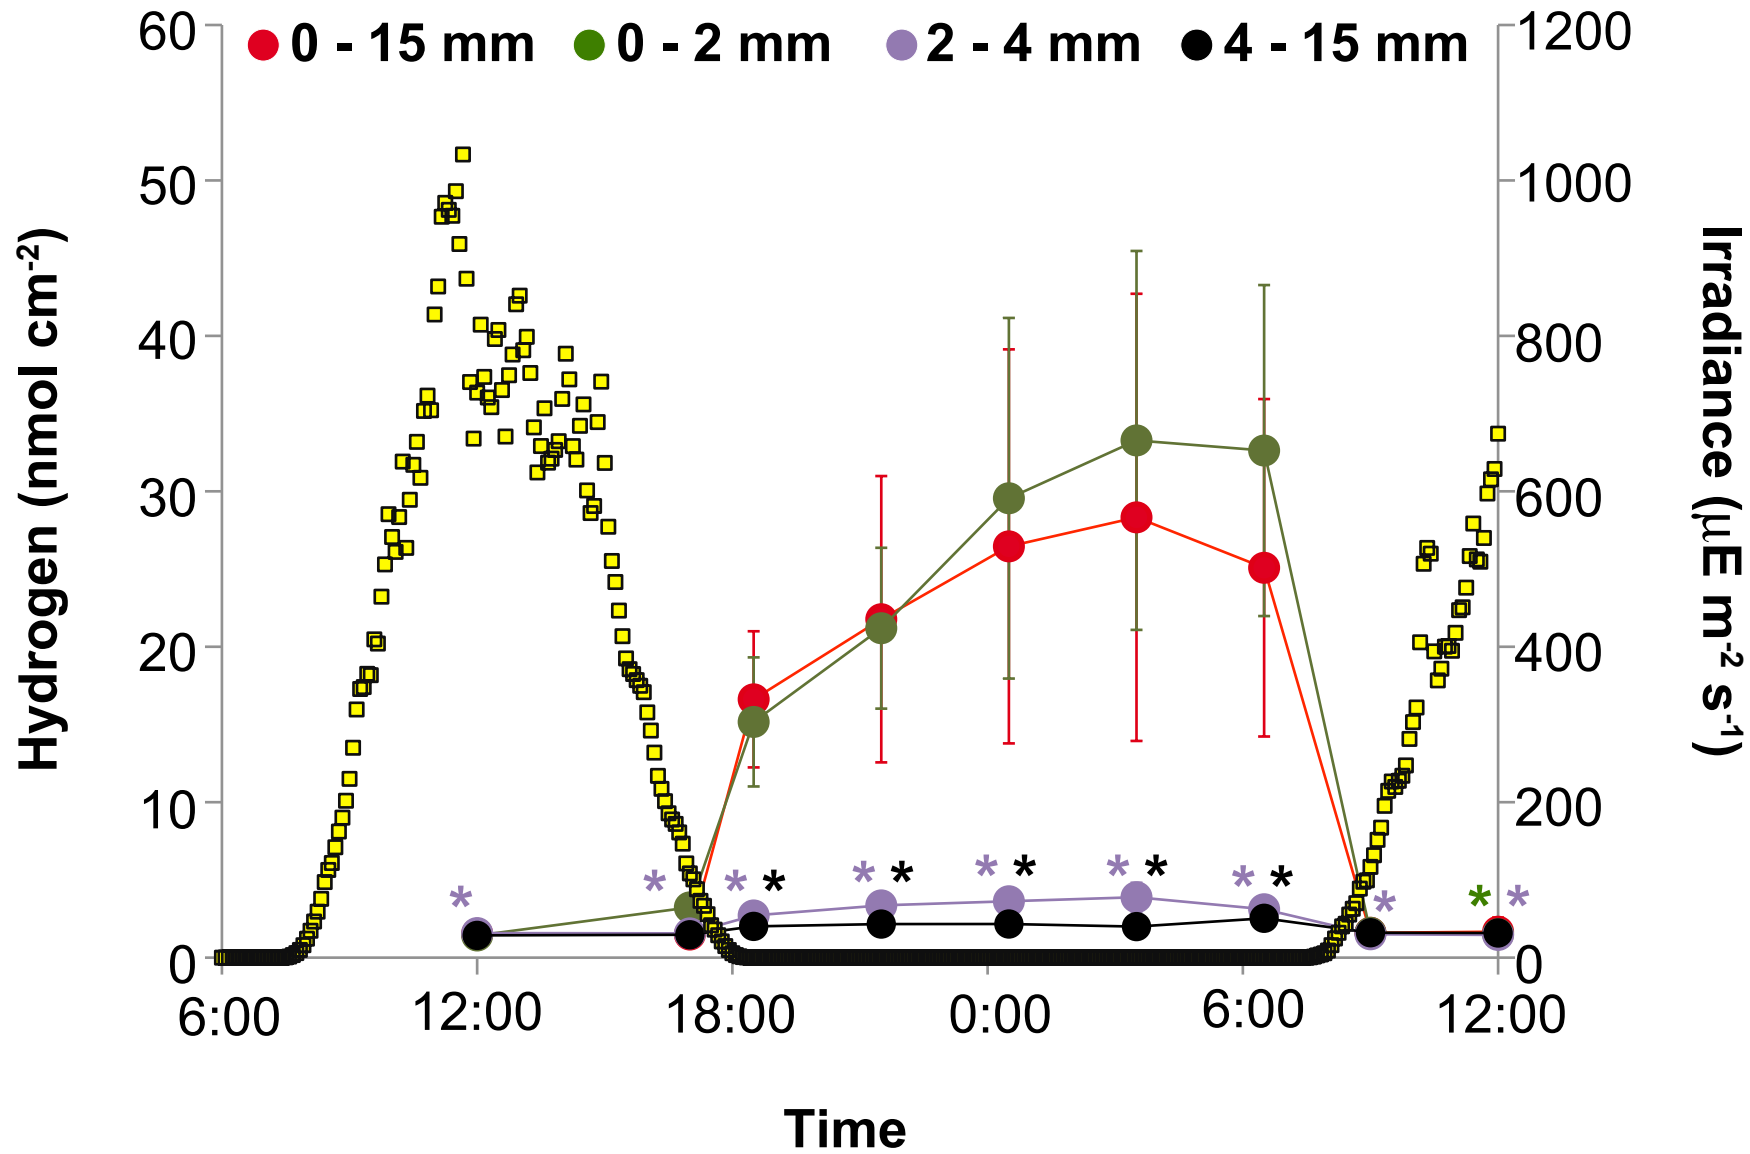

Supplement: ismej2011142x1.pdf [file ismej2011142x1.pdf]

**A**

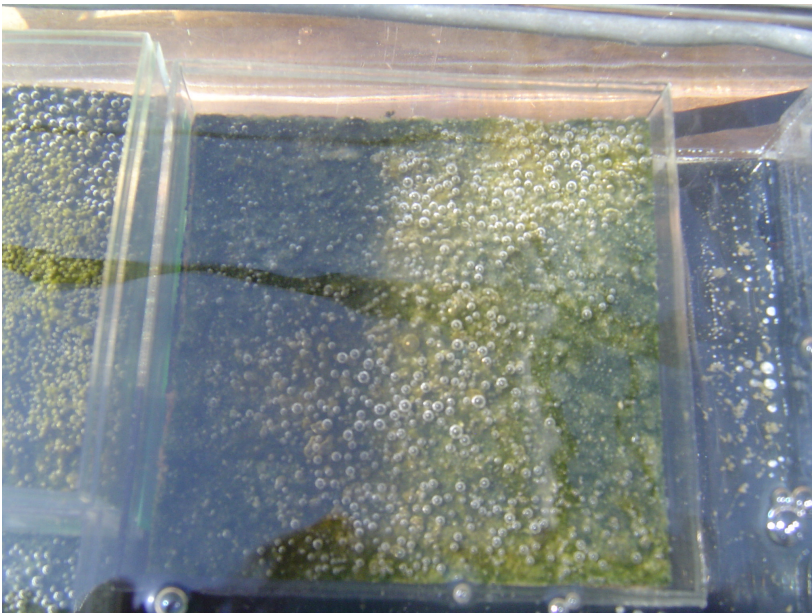

**B**

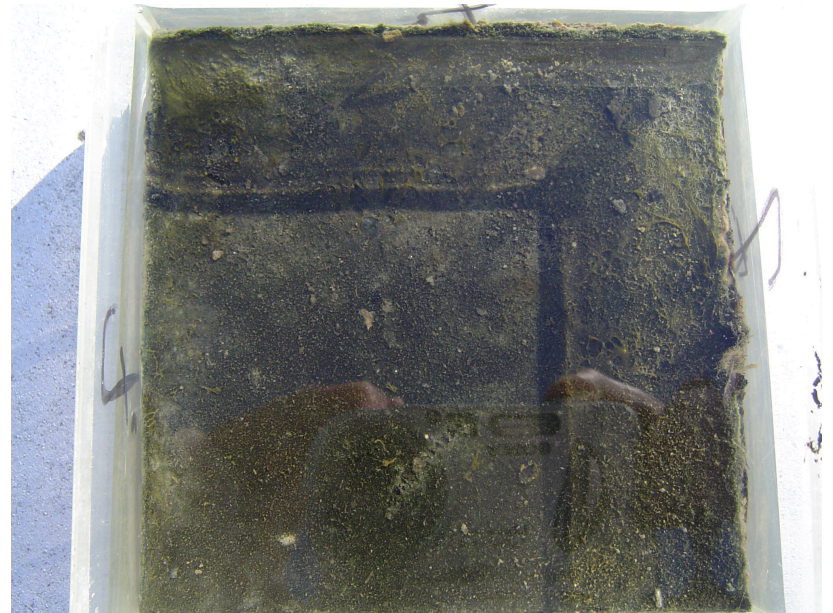

Supplement: ismej2011142x2.pdf [file ismej2011142x2.pdf]

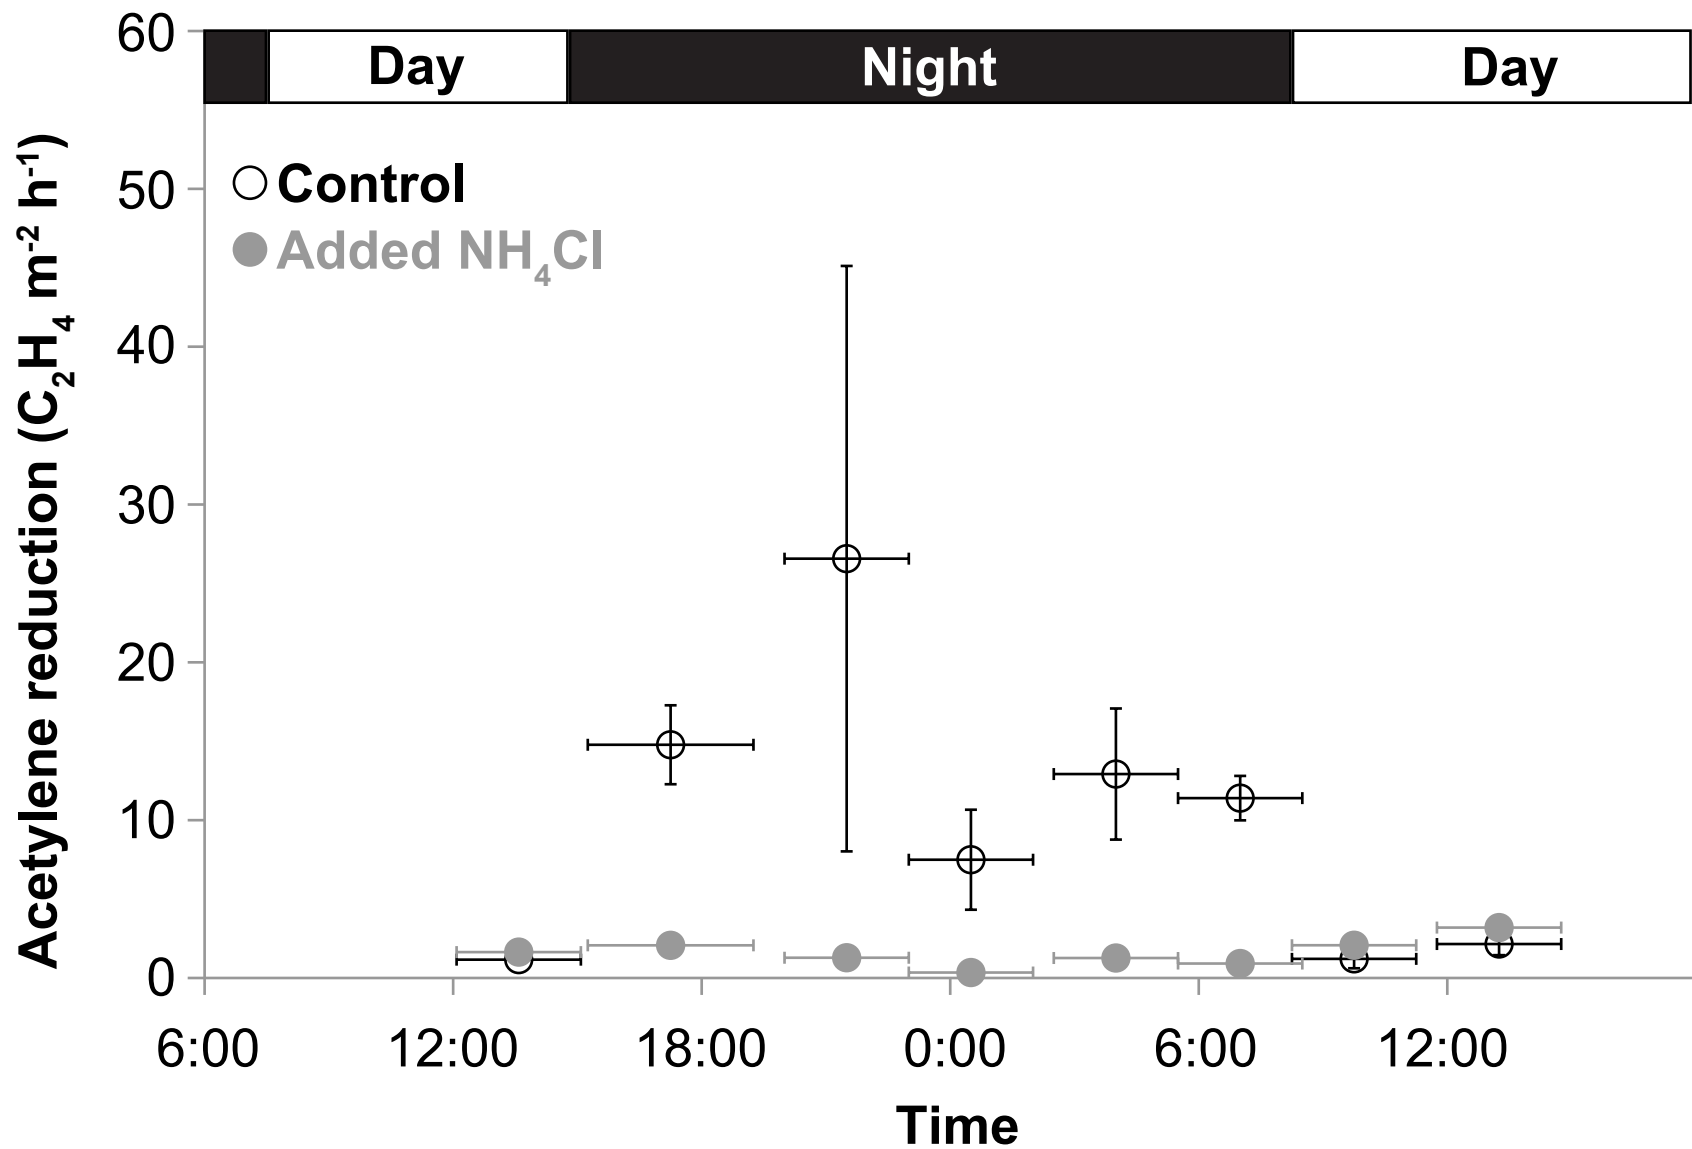

Supplement: ismej2011142x3.pdf [file ismej2011142x3.pdf]
